# Supplementary material for: Super-Long SERS Active Single Silver Nanowires for Molecular Imaging in 2D and 3D Cell Culture Models
Source: MDPI journal article supplement (doi:10.3390/bios12100875), 2022-10-15
Supplement: s1 [file s1]

Supplementary Information

# Super-Long SERS Active Single Silver Nanowires for Molecular Imaging in 2D and 3D Cell Culture Models

Xiao-Tong Pan <sup>1</sup>, Xuan-Ye Yang <sup>2</sup>, Tian-Qi Mao <sup>1</sup>, Kang Liu <sup>1</sup>, Zao-Zao Chen <sup>3</sup>, Li-Na Ji <sup>4,\*</sup>, Dechen Jiang <sup>1,\*</sup>, Kang Wang <sup>1,\*</sup>, Zhong-Ze Gu <sup>3</sup> and Xing-Hua Xia <sup>1</sup>

<sup>1</sup> State Key Laboratory of Analytical Chemistry for Life Science, School of Chemistry and Chemical Engineering, Nanjing University, Nanjing 210023, China

<sup>2</sup> Institute of Theoretical and Computational Chemistry, Key Laboratory of Mesoscopic Chemistry of the Ministry of Education (MOE), School of Chemistry and Chemical Engineering, Nanjing University, Nanjing 210023, China

<sup>3</sup> State Key Laboratory of Bioelectronics, School of Biological Science and Medical Engineering, Southeast University, Nanjing 210096, China

<sup>4</sup> State Key Laboratory of Pharmaceutical Biotechnology, School of Life Sciences, Nanjing University, Nanjing 210023, China

\* Correspondence: jilina@nju.edu.cn (L.-N.J.); dechenjiang@nju.edu.cn (D.J.); wangkang@nju.edu.cn (K.W.)

## 1. Fabrication of Carbon Nanoelectrodes by Chemical Vapor Deposition (CVD).

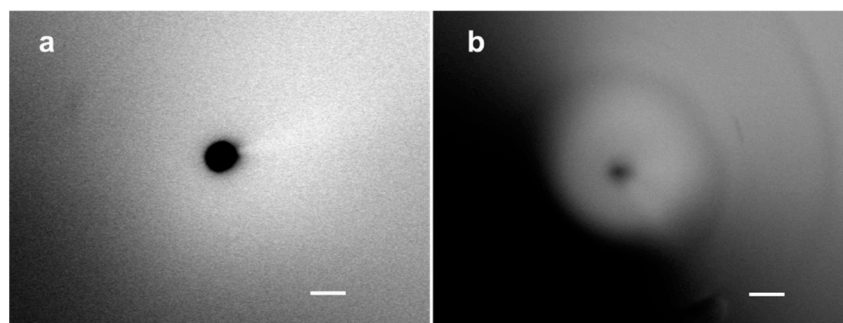

**Figure S1.** SEM images of the glass capillary orifice before (a) and after (b) CVD. Scale bars in (a) and (b): 100 nm.

We used carbon nanoelectrodes with a diameter of 40 nm as reported previously<sup>1</sup>. The present work shows that carbon nanoelectrodes with a diameter of 100 nm could also be used in the growth of AgNWs.

## 2. Effect of Reduction Current on the Surface Roughness of AgNW.

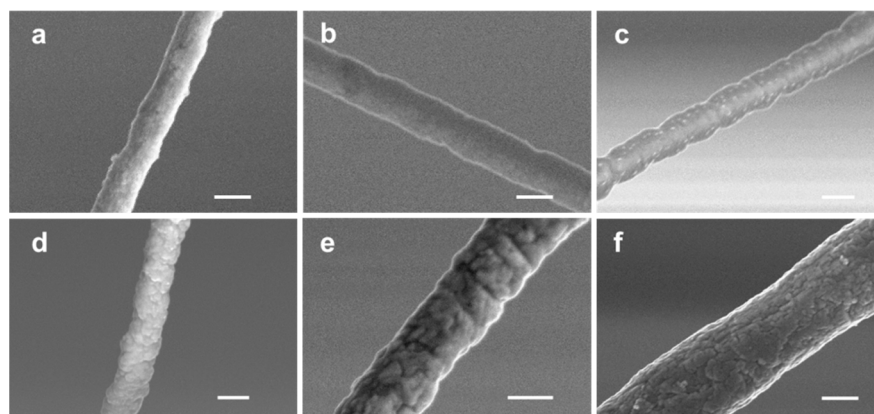

**Figure S2.** SEM images of AgNWs synthesized by reduction currents of 0.2 nA (a), 0.5 nA (b), 1 nA (c), 1.5 nA (d), 2 nA (e) and 2.5 nA (f), respectively. Scale bars: 200 nm. As observed, the diameter and roughness of AgNWs increases with the reduction current.

The range of reduction current for AgNW growing was 0.7~1.2 nA in our previous report<sup>1</sup>, while it was expanded to 0.2~2.8 nA in the present study. The change in reduction current range might be due to the reason that the potentiostat was changed from Autolab to CHI 660E.

### 3. Evaluation of Raman Enhancement.

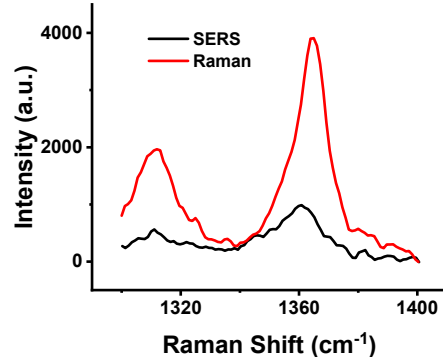

**Figure S3.** SERS spectrum (black) of  $10^{-9}$  M Rhodamine (R6G) on an AgNW and Raman spectrum (red) of  $10^{-3}$  M R6G.

The SERS spectrum was taken from an AgNW immersed in  $10^{-9}$  M R6G solution under 20 s integration time. The Raman spectrum of  $10^{-3}$  M R6G was also measured under 20 s integration time.

The Raman enhancement factor (EF) was estimated according to the following Equation S1:

$$EF = \frac{I_{SERS}/N_{SERS}}{I_{Raman}/N_{Raman}} = \frac{I_{SERS}/C_{SERS}}{I_{Raman}/C_{Raman}} \quad (S1)$$

$I_{SERS}$  and  $I_{Raman}$  indicate the intensities of the specific Raman bands. Herein, the band around  $1362 \text{ cm}^{-1}$  is selected for EF calculation.  $N_{SERS}$  is the number of molecules contributing to  $I_{SERS}$  while  $N_{Raman}$  is the number of molecules that yield  $I_{Raman}$ .  $C_{SERS}$  and  $C_{Raman}$  indicate the concentration of solutions used in SERS and Raman measurement, respectively.

As shown in **Figure S3**,  $I_{SERS}$  is around 988 and  $I_{Raman}$  is around 3909, while  $C_{SERS}$  is  $10^{-9}$  M and  $C_{Raman}$  is  $10^{-3}$  M.

Thus, the EF is calculated to be:

$$EF = 2.53 \times 10^5$$

### 4. Relative Standard Deviation (RSD) of Band Area on AgNW

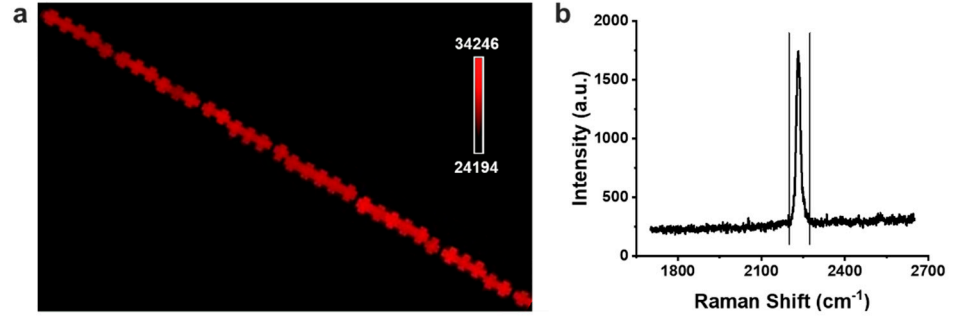

**Figure S4.** (a) SERS mapping of an AgNW modified with 4-MBN. Data points were taken every 1  $\mu\text{m}$  with the laser power of 10% and the spectra integration time of 2 s. (b) One of the typical spectra in the SERS mapping. The band area between 2200  $\text{cm}^{-1}$  and 2274  $\text{cm}^{-1}$  in the spectra was integrated for RSD calculation.

**Table S1.** The SERS band areas of cyano group along an AgNW.

| Rank | Band Area (a.u.) | Rank | Band Area (a.u.) |
|------|------------------|------|------------------|
| 1    | 29143.195        | 18   | 29195.261        |
| 2    | 28961.739        | 19   | 29647.917        |
| 3    | 28054.444        | 20   | 30213.038        |
| 4    | 28271.406        | 21   | 29644.97         |
| 5    | 28078.107        | 22   | 29849.891        |
| 6    | 28673.71         | 23   | 31913.219        |
| 7    | 29944.632        | 24   | 30568.047        |
| 8    | 29326.627        | 25   | 32207.109        |
| 8    | 29450.894        | 26   | 30575.937        |
| 9    | 27439.081        | 27   | 31211.052        |
| 10   | 29746.752        | 28   | 29060.356        |
| 11   | 29468.646        | 29   | 32615.391        |
| 12   | 30752.663        | 30   | 31282.051        |
| 13   | 30095.683        | 31   | 31857.992        |
| 14   | 29380.558        | 32   | 30761.382        |
| 15   | 29482.24         | 33   | 32082.844        |
| 16   | 29502.959        | 34   | 30481.278        |
| 17   |                  |      | 30481.278        |

The RSD of the band areas of cyano group along the AgNW is calculated according to the following equation S2:

$$RSD = \frac{\sqrt{\sum_{i=1}^n (x_i - \bar{x})^2}}{\bar{x}} \times 100\% \quad (\text{S2})$$

where  $\bar{x}$  is the average value of the band area. Thus, the RSD is calculated to be 4.22%.

## 5. Contour Graphs of Raman Spectra of Cell Culture Models.

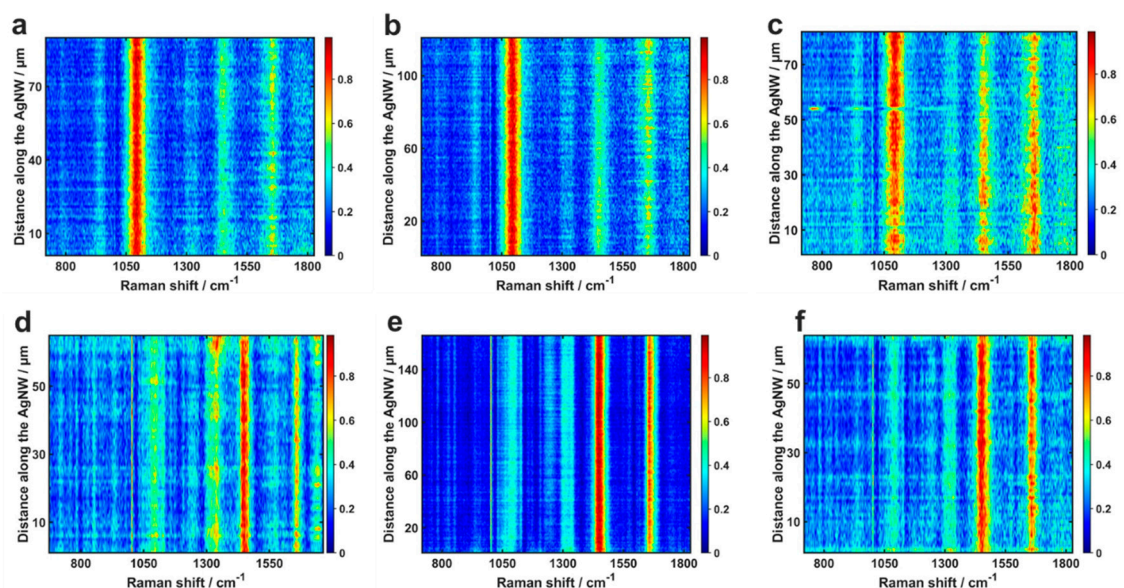

**Figure S5.** Contour graphs of Raman spectra along AgNW in 2D (a-c) and 3D (d-f) cell culture models. The number of SERS spectra obtained in the contour graphs was 90 (a), 121(b), 82(c), 65(d), 166(e), and 64(f), respectively.

## 6. Schematic Diagram of the Random Forest-Combined K-means++ Algorithm.

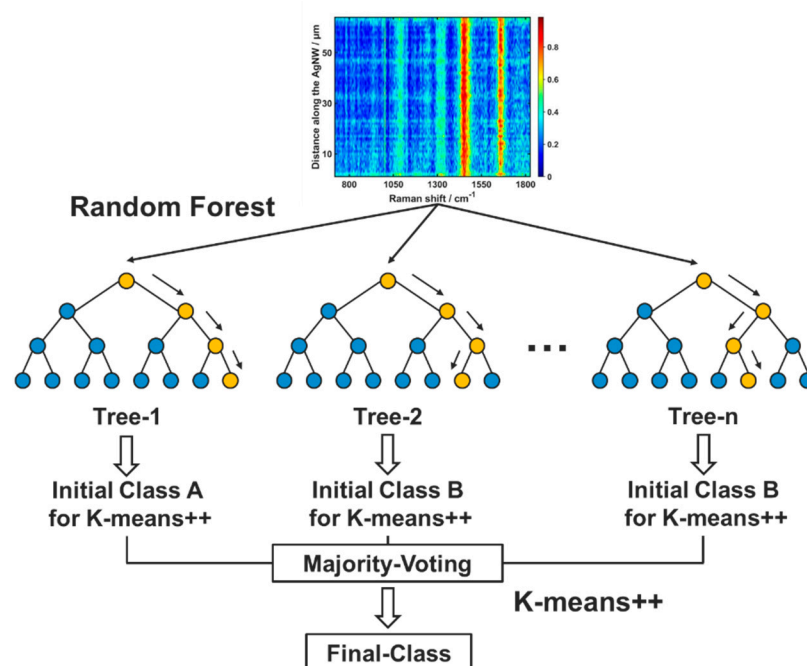

**Figure S6.** Schematic diagram of the Random Forest-combined K-means++ algorithm.

## 7. Application of Random Forest in 3D Model.

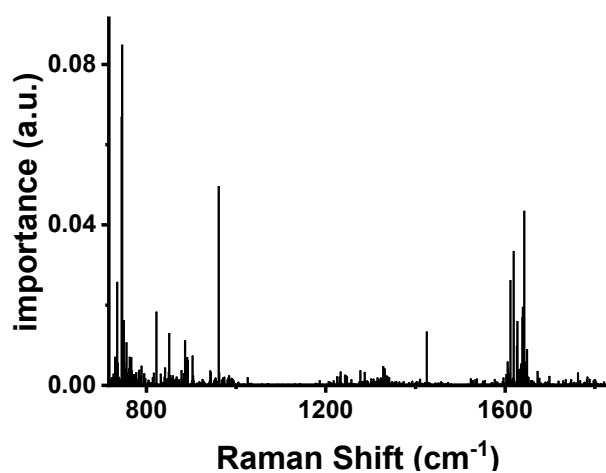

**Figure S7.** Importance of Raman shift learned from 562 SERS spectra of 3D models using Random Forest algorithm.

## References

1. Pan, X.-T.; Liu, Y.-Y.; Qian, S.-Q.; Yang, J.-M.; Li, Y.; Gao, J.; Liu, C.-G.; Wang, K.; Xia, X.-H., Free-standing single Ag nanowires for multifunctional optical probes. *ACS Appl. Mater. Inter.* **2021**, *13*, 19023–19030.
